# Supplementary material for: Simultaneous determination of ciprofloxacin and paracetamol by adsorptive stripping voltammetry using copper zinc ferrite nanoparticles modified carbon paste electrode
Source: Royal Society of Chemistry journal article supplement (doi:10.1039/c5ra19861e), 2016-01-01
Supplement: c5ra19861e1.pdf [file c5ra19861e1.pdf]

## Supporting information

### **Simultaneous determination of Ciprofloxacin and Paracetamol by Adsorptive Stripping Voltammetry using Copper Zinc Ferrite nanoparticles modified carbon paste electrode**

Mal Phebe Kingsley, Pramod K. Kalambate, Ashwini K. Srivastava\*

Department of Chemistry, University of Mumbai, Vidyanagari, Santacruz (E),  
Mumbai-400098, India

---

\* To whom correspondence should be addressed.

E-mail: - [aksrivastava@chem.mu.ac.in](mailto:aksrivastava@chem.mu.ac.in), [akschbu@yahoo.com](mailto:akschbu@yahoo.com)

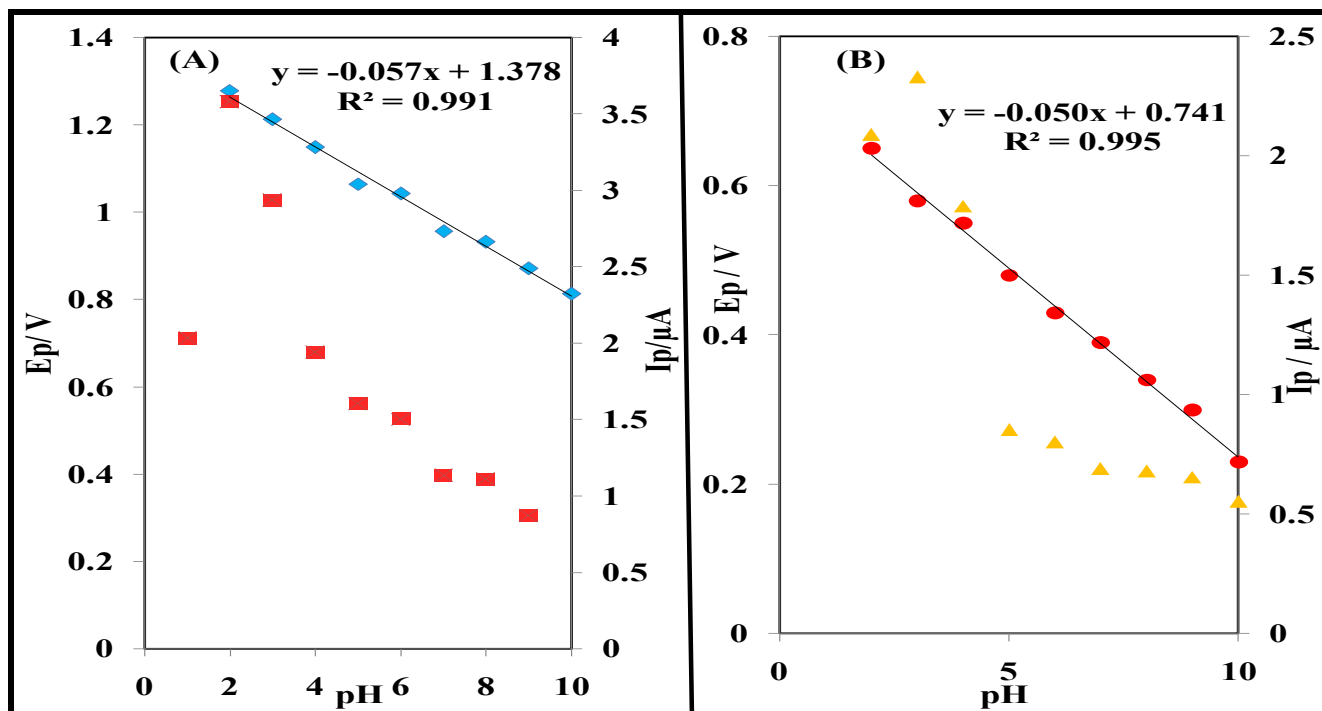

**Fig. S1 :** DPV plot of (A)  $I_p$  vs. pH (■ ■ ■ ■) and  $E_p$  vs. pH (◆ ◆ ◆ ◆) for  $5.00 \times 10^{-5}$  M CIP and (B)  $I_p$  vs. pH (▲ ▲ ▲) and  $E_p$  vs. pH (● ● ●) for  $1.00 \times 10^{-6}$  M PA at CPE.

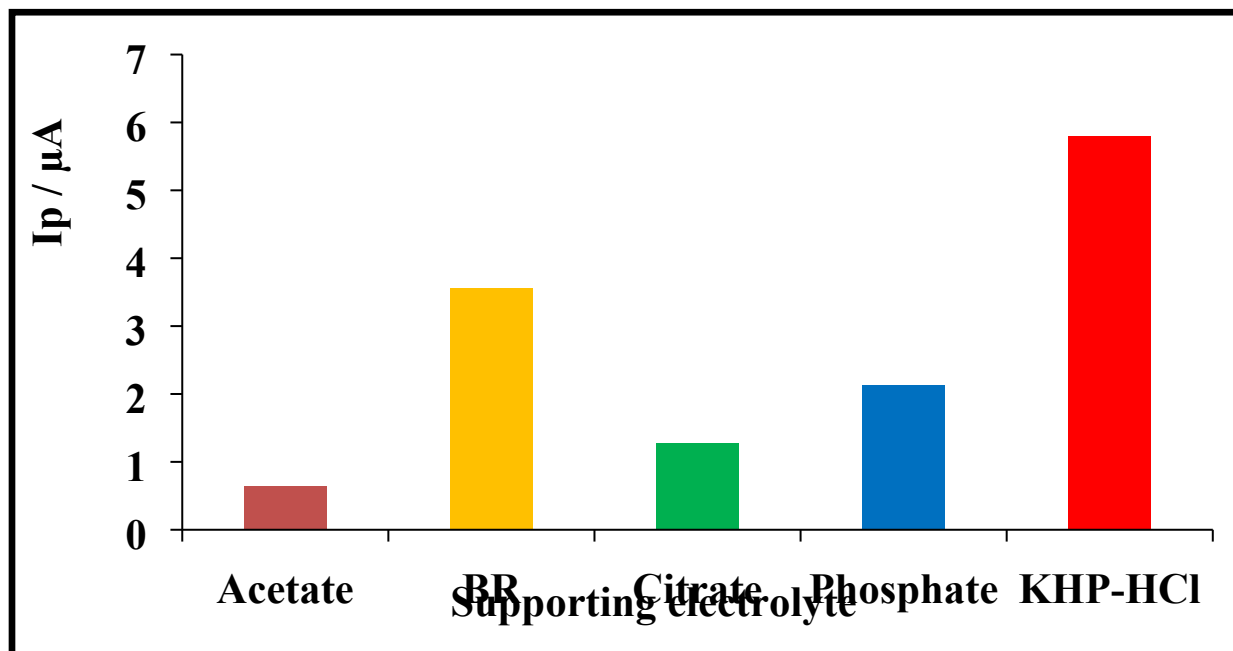

**Fig. S2:** Effect of supporting electrolytes (pH 3.0) on anodic peak current of  $5.00 \times 10^{-5}$  M CIP at CPE

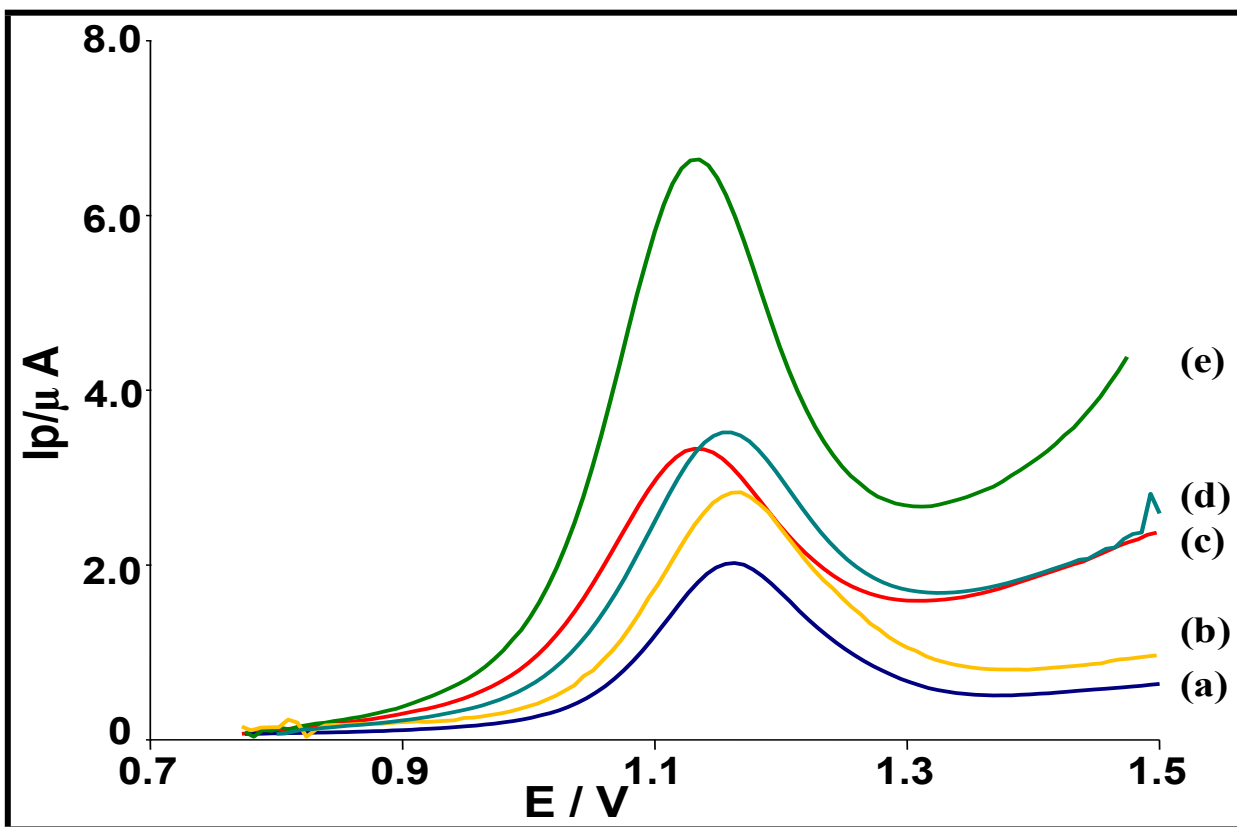

**Fig. S3** : DPV of for  $5.00 \times 10^{-5}$  M CIP in 0.05M KHP (pH 3.0) (a) carbon paste electrodes (b) Zinc ferrite carbon paste electrode (c) magnetite carbon paste electrode (d) Copper ferrite carbon paste electrode and (e) Copper Zinc ferrite carbon paste electrode (CZF-CME).

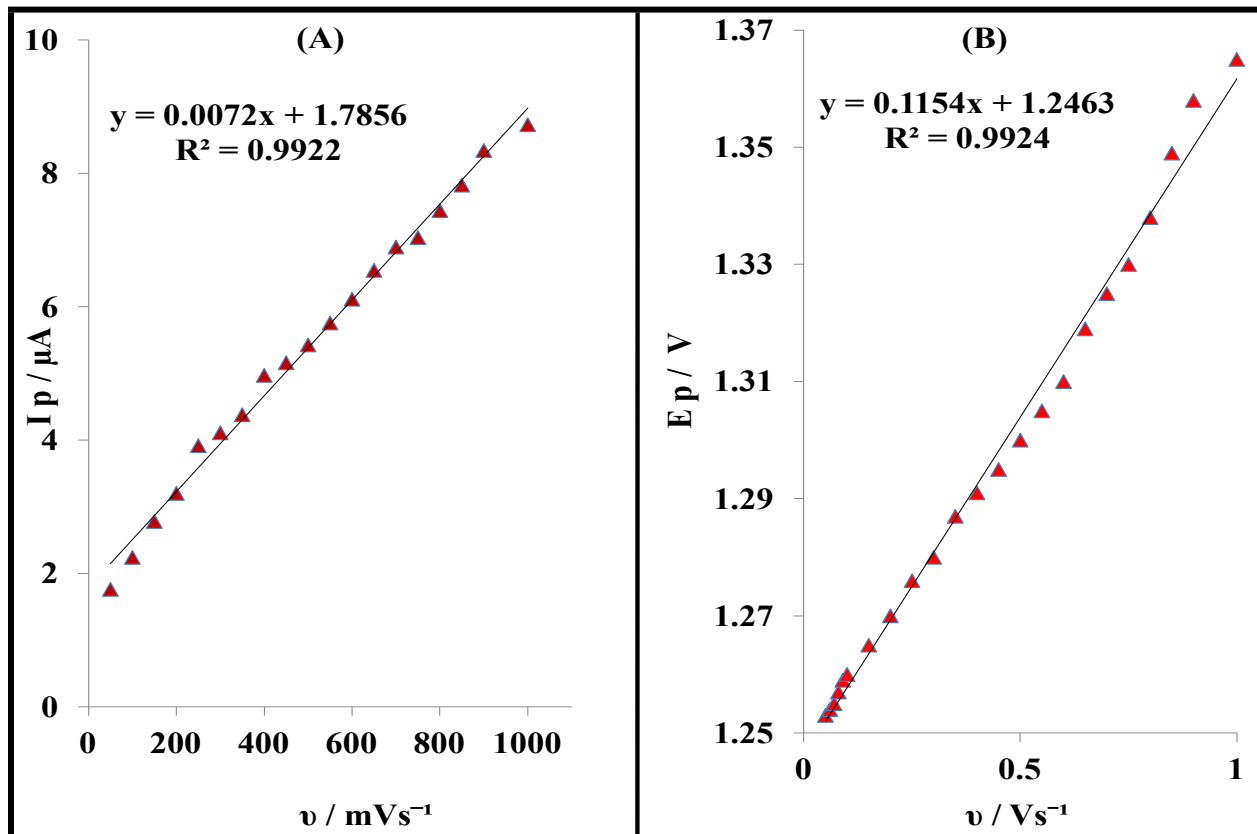

**Fig. S4** (A) Plot of  $I_p$  vs  $\nu$  (B) Plot of  $E_p$  vs  $\nu$  for  $5.00 \times 10^{-5}$  M CIP in 0.05 M KHP (pH 3.0) at CZF-CME

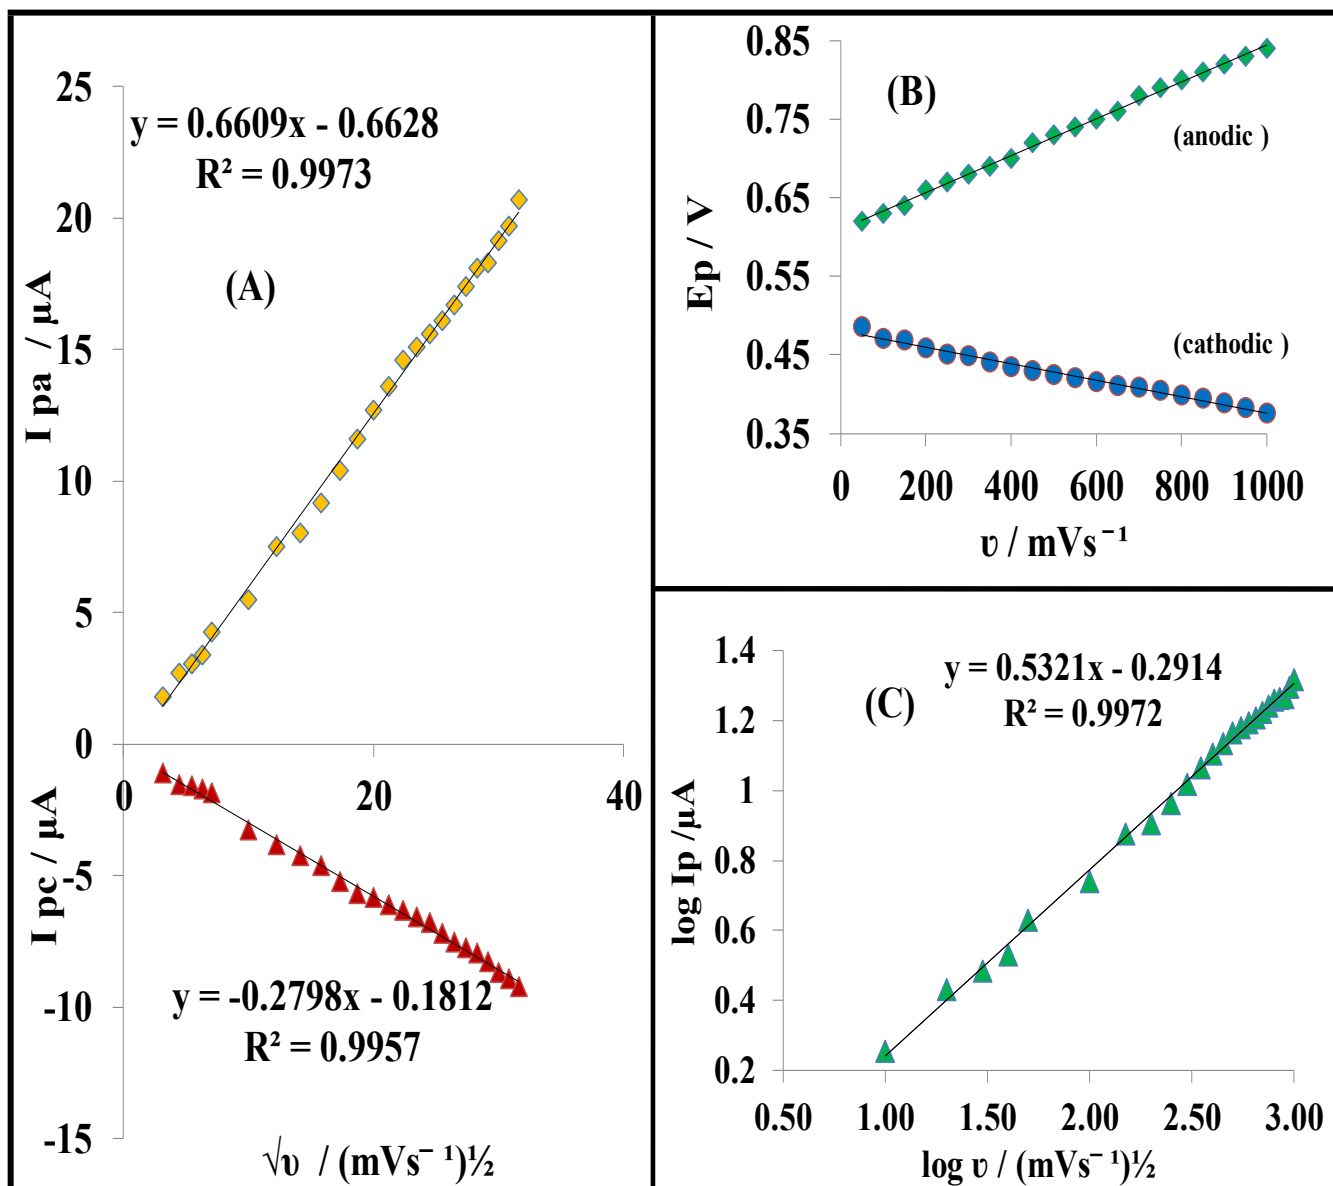

**Fig. S5:** (A) Plot of  $I_p$  (anodic and cathodic peak) vs  $\sqrt{v}$  (B) Plot of  $E_p$  (anodic and cathodic peak) vs  $v$  (C) Plot of  $\log I_p$  (anodic peak) vs  $\log v$  for  $1.00 \times 10^{-6}$  M PA in 0.05M KHP (pH 3.0) at CZF-CME

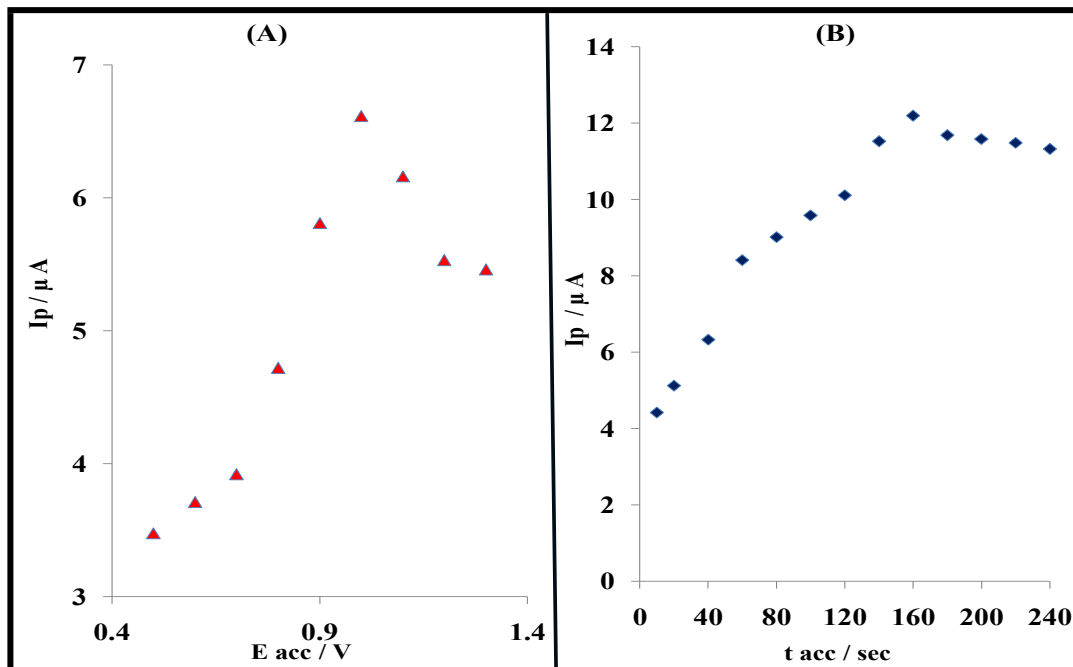

**Fig. S6:** Influence of (A) accumulation potential and (B) accumulation time on the oxidation peak current of  $5.00 \times 10^{-5}$  M CIP at CZF-CME in 0.05 M KHP-HCl (pH 3.0)

| Electrode                   | Graphite (mg) | Copper Zinc Ferrite nanoparticles (mg) | Mineral oil (mg) |
|-----------------------------|---------------|----------------------------------------|------------------|
| CZF – CME1                  | 64            | 6                                      | 30               |
| CZF –CME2                   | 62            | 8                                      | 30               |
| <b>CZF –CME3 (CZF –CME)</b> | <b>60</b>     | <b>10</b>                              | <b>30</b>        |
| CZF – CME4                  | 59            | 11                                     | 30               |
| CZF – CME5                  | 58            | 12                                     | 30               |

**Table S1:** Composition of various modified electrode with the weight ratios of graphite: Copper Zinc Ferrite nanoparticles: mineral oil

| Parameter              | AdSDPV               |
|------------------------|----------------------|
| pH                     | 3                    |
| Supporting Electrolyte | 0.05M KHP-HCl        |
| Accumulation Potential | 1.0 V                |
| Accumulation Time      | 160 seconds          |
| Stirring rate          | 800 rpm              |
| Pulse amplitude        | 60mV                 |
| Pulse step             | 0.005V               |
| Scan rate              | 100mVs <sup>-1</sup> |

**Table S2:** Optimal parameters for determination of CIP and PA simultaneously by AdSDPV technique.

|                            | Ciprofloxacin      |                    |                                   | Paracetamol        |                    |                                   |
|----------------------------|--------------------|--------------------|-----------------------------------|--------------------|--------------------|-----------------------------------|
|                            | std drug added     | Drug conc          | Apparent Recovery (%)<br>±<br>RSD | std drug added     | Drug conc          | Apparent Recovery (%)<br>±<br>RSD |
|                            | 10 <sup>-6</sup> M | 10 <sup>-6</sup> M |                                   | 10 <sup>-5</sup> M | 10 <sup>-5</sup> M |                                   |
| <b>Ciplox + Crocin</b>     | —                  | 9.09               | —                                 | —                  | 6.11               | —                                 |
|                            | 24.21              | 34.13              | 102.4 ± 2.1                       | 3.64               | 9.86               | 101.1 ± 1.23                      |
|                            | 40.91              | 52.15              | 104.3 ± 1.17                      | 13.33              | 19.31              | 99.3 ± 1.73                       |
|                            | 57.51              | 65.9               | 98.9 ± 1.45                       | 24.40              | 31.95              | 104.7 ± 2.45                      |
| <b>Zoxan Eye/Ear drops</b> | —                  | 3.61               | —                                 | —                  | —                  | —                                 |
|                            | 1.81               | 5.35               | 98.7 ± 1.61                       | —                  | —                  | —                                 |
|                            | 3.33               | 7.09               | 102.2 ± 1.56                      | —                  | —                  | —                                 |
|                            | 4.61               | 8.35               | 101.6 ± 1.84                      | —                  | —                  | —                                 |
| <b>Flexon</b>              | —                  | —                  | —                                 | —                  | 3.64               | —                                 |
|                            | —                  | —                  | —                                 | 1.33               | 5.03               | 101.2 ± 2.23                      |
|                            | —                  | —                  | —                                 | 2.40               | 5.95               | 98.5 ± 1.61                       |
|                            | —                  | —                  | —                                 | 2.66               | 6.52               | 103.5 ± 1.98                      |
| <b>Blood Serum</b>         | —                  | ND                 | —                                 | —                  | ND                 | —                                 |
|                            | 0.75               | 0.78               | 104.0 ± 2.49                      | 0.78               | 0.81               | 103.8 ± 2.95                      |
|                            | 1.65               | 1.62               | 98.2 ± 3.43                       | 3.81               | 3.77               | 98.9 ± 2.72                       |



|              |       |       |              |       |       |              |
|--------------|-------|-------|--------------|-------|-------|--------------|
|              | 5.48  | 5.56  | 101.4 ± 2.21 | 6.42  | 6.47  | 100.7 ± 1.69 |
|              | 9.37  | 9.28  | 99.0 ± 2.84  | 8.49  | 8.58  | 101.1 ± 2.53 |
| <b>Urine</b> | —     | ND    | —            | —     | ND    | —            |
|              | 4.85  | 4.83  | 99.6 ± 2.71  | 3.69  | 3.64  | 98.6 ± 2.53  |
|              | 8.49  | 8.54  | 100.6 ± 3.13 | 5.42  | 5.48  | 101.1 ± 3.27 |
|              | 11.54 | 11.39 | 98.7 ± 2.49  | 10.72 | 10.78 | 100.5 ± 2.76 |
|              | 13.67 | 13.79 | 100.9 ± 1.96 | 12.18 | 12.36 | 101.5 ± 2.99 |

**Table S3:** Recovery test for CIP and/or PA in pharmaceutical, blood serum and urine samples (n=5) at CZF-CME in 0.05M KHP-HCl (pH 3.0) by AdSDPV
